# Supplementary material for: Sex/Gender Disparities in Preemptive Referrals for Kidney Transplantation
Source: PubMed Central journal article supplement — Kidney Int Rep. 2024 Apr 15;9(7):2134–45. doi: 10.1016/j.ekir.2024.04.025 (PMC11284440; doi:10.1016/j.ekir.2024.04.025), 2024-04-15
Supplement: mmc1.pdf [file mmc1.pdf]

## Supplementary Tables

**Supplementary Table 1** STROBE Statement—Checklist of items that should be included in reports of *cohort studies*

|                              | Item No | Recommendation                                                                                                                                                                                                                                                                                                         | Page                                  |
|------------------------------|---------|------------------------------------------------------------------------------------------------------------------------------------------------------------------------------------------------------------------------------------------------------------------------------------------------------------------------|---------------------------------------|
| <b>Title and abstract</b>    | 1       | (a) Indicate the study's design with a commonly used term in the title or the abstract<br>(b) Provide in the abstract an informative and balanced summary of what was done and what was found                                                                                                                          | 1<br>3-4                              |
| <b>Introduction</b>          |         |                                                                                                                                                                                                                                                                                                                        |                                       |
| Background/rationale         | 2       | Explain the scientific background and rationale for the investigation being reported                                                                                                                                                                                                                                   | 5                                     |
| Objectives                   | 3       | State specific objectives, including any prespecified hypotheses                                                                                                                                                                                                                                                       | 6                                     |
| <b>Methods</b>               |         |                                                                                                                                                                                                                                                                                                                        |                                       |
| Study design                 | 4       | Present key elements of study design early in the paper                                                                                                                                                                                                                                                                | 6                                     |
| Setting                      | 5       | Describe the setting, locations, and relevant dates, including periods of recruitment, exposure, follow-up, and data collection                                                                                                                                                                                        | 6                                     |
| Participants                 | 6       | (a) Give the eligibility criteria, and the sources and methods of selection of participants. Describe methods of follow-up<br>(b) For matched studies, give matching criteria and number of exposed and unexposed                                                                                                      | 6<br>n/a                              |
| Variables                    | 7       | Clearly define all outcomes, exposures, predictors, potential confounders, and effect modifiers. Give diagnostic criteria, if applicable                                                                                                                                                                               | 6,7                                   |
| Data sources/<br>measurement | 8*      | For each variable of interest, give sources of data and details of methods of assessment (measurement). Describe comparability of assessment methods if there is more than one group                                                                                                                                   | 6-8                                   |
| Bias                         | 9       | Describe any efforts to address potential sources of bias                                                                                                                                                                                                                                                              | 9                                     |
| Study size                   | 10      | Explain how the study size was arrived at                                                                                                                                                                                                                                                                              | 6, Fig 1                              |
| Quantitative variables       | 11      | Explain how quantitative variables were handled in the analyses. If applicable, describe which groupings were chosen and why                                                                                                                                                                                           | 8-9                                   |
| Statistical methods          | 12      | (a) Describe all statistical methods, including those used to control for confounding<br>(b) Describe any methods used to examine subgroups and interactions<br>(c) Explain how missing data were addressed<br>(d) If applicable, explain how loss to follow-up was addressed<br>(e) Describe any sensitivity analyses | 8-9<br>9<br>8-9<br>9                  |
| <b>Results</b>               |         |                                                                                                                                                                                                                                                                                                                        |                                       |
| Participants                 | 13*     | (a) Report numbers of individuals at each stage of study—eg numbers potentially eligible, examined for eligibility, confirmed eligible, included in the study, completing follow-up, and analysed<br>(b) Give reasons for non-participation at each stage<br>(c) Consider use of a flow diagram                        | 10, Fig 1<br>Fig 1<br>Fig 1           |
| Descriptive data             | 14*     | (a) Give characteristics of study participants (eg demographic, clinical, social) and information on exposures and potential confounders<br>(b) Indicate number of participants with missing data for each variable of interest<br>(c) Summarise follow-up time (eg, average and total amount)                         | 10, Table 1, Stable 1<br>Table 1<br>6 |
| Outcome data                 | 15*     | Report numbers of outcome events or summary measures over time                                                                                                                                                                                                                                                         | 10-11                                 |

|                          |    |                                                                                                                                                                                                                                                                                                                                                                                                               |                        |
|--------------------------|----|---------------------------------------------------------------------------------------------------------------------------------------------------------------------------------------------------------------------------------------------------------------------------------------------------------------------------------------------------------------------------------------------------------------|------------------------|
| Main results             | 16 | (a) Give unadjusted estimates and, if applicable, confounder-adjusted estimates and their precision (eg, 95% confidence interval). Make clear which confounders were adjusted for and why they were included<br>(b) Report category boundaries when continuous variables were categorized<br>(c) If relevant, consider translating estimates of relative risk into absolute risk for a meaningful time period | 10-12<br>10-12, Tables |
| Other analyses           | 17 | Report other analyses done—eg analyses of subgroups and interactions, and sensitivity analyses                                                                                                                                                                                                                                                                                                                | 12                     |
| <b>Discussion</b>        |    |                                                                                                                                                                                                                                                                                                                                                                                                               |                        |
| Key results              | 18 | Summarise key results with reference to study objectives                                                                                                                                                                                                                                                                                                                                                      | 12-13                  |
| Limitations              | 19 | Discuss limitations of the study, taking into account sources of potential bias or imprecision. Discuss both direction and magnitude of any potential bias                                                                                                                                                                                                                                                    | 15                     |
| Interpretation           | 20 | Give a cautious overall interpretation of results considering objectives, limitations, multiplicity of analyses, results from similar studies, and other relevant evidence                                                                                                                                                                                                                                    | 16                     |
| Generalisability         | 21 | Discuss the generalisability (external validity) of the study results                                                                                                                                                                                                                                                                                                                                         | 12-14                  |
| <b>Other information</b> |    |                                                                                                                                                                                                                                                                                                                                                                                                               |                        |
| Funding                  | 22 | Give the source of funding and the role of the funders for the present study and, if applicable, for the original study on which the present article is based                                                                                                                                                                                                                                                 | 17-18                  |

---

**Supplementary Table 2** Characteristics of patients initiating KRT from 2015 to 2019, stratified by sex/gender and referral status

|                                           | Women        |                               |                       | Men          |                               |                       |
|-------------------------------------------|--------------|-------------------------------|-----------------------|--------------|-------------------------------|-----------------------|
|                                           | Not referred | Referred after dialysis start | Preemptively referred | Not referred | Referred after dialysis start | Preemptively referred |
| N                                         | 9,420        | 6,729                         | 3,470                 | 10,670       | 9,544                         | 4,371                 |
| <b>Patient-level characteristics</b>      |              |                               |                       |              |                               |                       |
| <i>Age</i>                                | 64.1 ± 11.6  | 54.9 ± 13.2                   | 54.6 ± 13.1           | 62.9 ± 12.0  | 54.7 ± 12.8                   | 55.7 ± 12.7           |
| Mean ± SD                                 |              |                               |                       |              |                               |                       |
| 18-29                                     | 133 (1.4)    | 338 (5.0)                     | 160 (4.6)             | 146 (1.4)    | 364 (3.8)                     | 156 (3.6)             |
| 30-39                                     | 268 (2.9)    | 658 (9.8)                     | 352 (10.1)            | 398 (3.7)    | 908 (9.5)                     | 369 (8.4)             |
| 40-49                                     | 686 (7.3)    | 1,089 (16.2)                  | 621 (17.9)            | 949 (8.9)    | 1,846 (19.3)                  | 762 (17.4)            |
| 50-59                                     | 1,588 (16.9) | 1,763 (26.2)                  | 876 (25.2)            | 2,103 (19.7) | 2,638 (27.6)                  | 1,177 (26.9)          |
| 60-69                                     | 3,089 (32.8) | 2,077 (30.9)                  | 1,087 (31.3)          | 3,269 (30.6) | 2,621 (27.5)                  | 1,344 (30.8)          |
| 70-79                                     | 3,656 (38.8) | 804 (12.0)                    | 374 (10.8)            | 3,805 (35.7) | 1,167 (12.2)                  | 563 (12.9)            |
| <i>Race/Ethnicity Group</i>               |              |                               |                       |              |                               |                       |
| White                                     | 4,156 (44.1) | 1,971 (29.3)                  | 1,507 (43.4)          | 5,158 (48.3) | 3,419 (35.8)                  | 2,261 (51.7)          |
| Black                                     | 4,804 (51.0) | 4,451 (66.2)                  | 1,778 (51.2)          | 4,882 (45.8) | 5,568 (58.3)                  | 1,865 (42.7)          |
| Hispanic                                  | 290 (3.1)    | 145 (2.2)                     | 76 (2.2)              | 425 (4.0)    | 311 (3.3)                     | 108 (2.5)             |
| Other                                     | 170 (1.8)    | 162 (2.4)                     | 109 (3.1)             | 205 (1.9)    | 246 (2.6)                     | 137 (3.1)             |
| <i>Insurance Status</i>                   |              |                               |                       |              |                               |                       |
| Medicaid                                  | 2,842 (30.2) | 1,918 (28.5)                  | 675 (19.5)            | 2,052 (19.2) | 1,634 (17.1)                  | 482 (11.0)            |
| Medicare                                  | 4,631 (49.2) | 2,148 (31.9)                  | 1,074 (31.0)          | 5,253 (49.2) | 3,081 (32.3)                  | 1,472 (33.7)          |
| Employer                                  | 887 (9.4)    | 1,396 (20.8)                  | 1,334 (38.4)          | 1,177 (11.0) | 2,327 (24.4)                  | 1,855 (42.4)          |
| Other                                     | 376 (4.0)    | 490 (7.3)                     | 300 (8.7)             | 1,117 (10.5) | 994 (10.4)                    | 432 (9.9)             |
| None                                      | 684 (7.3)    | 777 (11.6)                    | 87 (2.5)              | 1,071 (10.0) | 1,508 (15.8)                  | 130 (3.0)             |
| <i>Attributed Cause of Kidney Failure</i> |              |                               |                       |              |                               |                       |
| Diabetes                                  | 4,652 (50.1) | 3,243 (48.8)                  | 1,405 (41.2)          | 4,861 (46.3) | 4,246 (45.1)                  | 1,769 (41.3)          |
| Hypertension                              | 3,240 (34.9) | 2,275 (34.2)                  | 963 (28.2)            | 3,902 (37.2) | 3,760 (39.9)                  | 1,312 (30.6)          |
| Glomerulonephritis                        | 467 (5.0)    | 640 (9.6)                     | 499 (14.6)            | 503 (4.8)    | 606 (6.4)                     | 546 (12.7)            |
| Other                                     | 922 (9.9)    | 494 (7.4)                     | 544 (16.0)            | 1,228 (11.7) | 809 (8.6)                     | 662 (15.4)            |
| <i>Obesity (BMI, kg/m<sup>2</sup>)</i>    |              |                               |                       |              |                               |                       |
| Mean BMI ±SD                              | 31.8 ± 9.7   | 32.0 ± 8.9                    | 30.2 ± 7.4            | 29.1 ± 7.9   | 30.4 ± 7.6                    | 29.9 ± 6.5            |
| Underweight                               | 369 (4.0)    | 166 (2.5)                     | 74 (2.1)              | 388 (3.7)    | 169 (1.8)                     | 52 (1.2)              |
| Normal                                    | 2,121 (22.7) | 1,413 (21.1)                  | 844 (24.4)            | 3,157 (29.7) | 2,181 (22.9)                  | 889 (20.4)            |
| Overweight                                | 2,092 (22.4) | 1,546 (23.1)                  | 895 (25.9)            | 3,083 (29.0) | 2,823 (29.7)                  | 1,479 (34.0)          |
| Obese class I                             | 1,773 (19.0) | 1,393 (20.8)                  | 831 (24.0)            | 2,030 (19.1) | 2,137 (22.5)                  | 1,097 (25.2)          |
| Obese class II                            | 1,282 (13.7) | 1,014 (15.1)                  | 503 (14.5)            | 1,001 (9.4)  | 1,182 (12.4)                  | 564 (13.0)            |
| Obese class III                           | 1,716 (18.4) | 1,172 (17.5)                  | 314 (9.1)             | 973 (9.2)    | 1,018 (10.7)                  | 274 (6.3)             |

*Comorbidities*

|                                                        |              |              |              |              |              |              |
|--------------------------------------------------------|--------------|--------------|--------------|--------------|--------------|--------------|
| Congestive heart failure                               | 3,209 (34.1) | 1,688 (25.1) | 432 (12.5)   | 3,440 (32.2) | 2,267 (23.8) | 587 (13.4)   |
| Atherosclerotic heart disease                          | 943 (10.0)   | 372 (5.5)    | 162 (4.7)    | 1,237 (11.6) | 740 (7.8)    | 283 (6.5)    |
| Other cardiac disease                                  | 1,880 (20.0) | 880 (13.1)   | 337 (9.7)    | 2,386 (22.4) | 1,433 (15.0) | 567 (13.0)   |
| Cerebrovascular disease                                | 1,126 (12.0) | 528 (7.9)    | 166 (4.8)    | 1,255 (11.8) | 703 (7.4)    | 229 (5.2)    |
| Peripheral vascular disease                            | 790 (8.4)    | 364 (5.4)    | 117 (3.4)    | 1,187 (11.1) | 630 (6.6)    | 219 (5.0)    |
| Hypertension                                           | 8,474 (90.0) | 6,126 (91.0) | 3,144 (90.6) | 9,454 (88.6) | 8,719 (91.4) | 3,953 (90.4) |
| Diabetes                                               | 6,348 (67.4) | 4,211 (62.6) | 1,817 (52.4) | 6,535 (61.3) | 5,615 (58.8) | 2,312 (52.9) |
| COPD                                                   | 1,262 (13.4) | 413 (6.1)    | 117 (3.4)    | 1,255 (11.8) | 520 (5.5)    | 129 (3.0)    |
| Cancer                                                 | 615 (6.5)    | 224 (3.3)    | 113 (3.3)    | 923 (8.7)    | 355 (3.7)    | 186 (4.3)    |
| Tobacco Use                                            | 778 (8.3)    | 468 (7.0)    | 133 (3.8)    | 1,323 (12.4) | 922 (9.7)    | 231 (5.3)    |
| Pre-KRT nephrology care                                | 6,230 (77.7) | 4,510 (77.1) | 3,047 (95.5) | 6,769 (74.5) | 6,110 (74.0) | 3,830 (94.8) |
| Patient has been informed of kidney transplant options | 8,579 (91.1) | 6,243 (92.8) | 2,890 (95.4) | 9,627 (90.2) | 8,825 (92.5) | 3,697 (95.4) |

**Neighborhood-Level-Factors***Neighborhood poverty level*

|                                             |              |              |              |              |              |              |
|---------------------------------------------|--------------|--------------|--------------|--------------|--------------|--------------|
| < 20% (low poverty)                         | 5,183 (55.7) | 3,697 (55.7) | 2,295 (67.1) | 6,104 (58.1) | 5,638 (59.9) | 3,104 (72.1) |
| >= 20% (high poverty)                       | 4,122 (44.3) | 2,940 (44.3) | 1,125 (32.9) | 4,407 (41.9) | 3,775 (40.1) | 1,201 (27.9) |
| Average % Black (mean ± SD)                 | 34.5 ± 23.4  | 38.1 ± 24.3  | 32.6 ± 23.9  | 32.6 ± 23.2  | 35.3 ± 23.9  | 29.5 ± 22.8  |
| Average % high school graduates (mean ± SD) | 84.5 ± 6.6   | 85.0 ± 6.6   | 86.6 ± 6.7   | 84.7 ± 6.8   | 85.2 ± 7.0   | 86.9 ± 6.6   |

---

Abbreviations: BMI = body mass index; COPD = chronic obstructive pulmonary disease; KRT = kidney replacement therapy

**Supplementary Table 3** Association between sex/gender and preemptive referral among patients initiating KRT from 2015 to 2019 using multivariable logistic regression and adding variables one at a time in a forward stepwise fashion

| Stepwise models                             | Odds Ratio (95%CI)<br>Women vs. men |
|---------------------------------------------|-------------------------------------|
| Crude (women vs. men)                       | 0.99 (0.95-1.04)                    |
| + age                                       | 1.02 (0.97-1.07)                    |
| + race                                      | 1.04 (0.99-1.10)                    |
| + insurance                                 | 1.10 (1.04-1.15)                    |
| + attributed cause of ESKD                  | 1.08 (1.02-1.13)                    |
| + obesity                                   | 1.14 (1.08-1.20)                    |
| + congestive heart failure                  | 1.13 (1.07-1.19)                    |
| + atherosclerotic heart disease             | 1.13 (1.07-1.19)                    |
| + other cardiac                             | 1.12 (1.06-1.18)                    |
| + cerebrovascular disease                   | 1.12 (1.06-1.18)                    |
| + Peripheral vascular disease               | 1.12 (1.06-1.18)                    |
| + Hypertension                              | 1.12 (1.06-1.18)                    |
| + Diabetes                                  | 1.12 (1.06-1.18)                    |
| + Chronic obstructive pulmonary disease     | 1.12 (1.06-1.19)                    |
| + Cancer                                    | 1.12 (1.06-1.18)                    |
| + Smoking                                   | 1.11 (1.05-1.17)                    |
| + Patient informed of transplant            | 1.08 (1.02-1.14)                    |
| + Neighborhood level-poverty                | 1.09 (1.03-1.15)                    |
| + Neighborhood level Black %                | 1.09 (1.03-1.15)                    |
| + Neighborhood level education (full model) | 1.09 (1.03-1.15)                    |

**Supplementary Table 4** Odds ratio for the association between sex/gender and preemptive referral by age, race, obesity, and attributed cause of kidney failure among all patients initiating KRT 2015-2019 with follow-up through 2020

|                                                      | Crude OR (95%CI) | P-value for interaction | Adjusted OR* (95%CI) | P-value for interaction |
|------------------------------------------------------|------------------|-------------------------|----------------------|-------------------------|
| Total population                                     |                  |                         |                      |                         |
| Women (vs. men)                                      | 0.99 (0.95-1.04) |                         | 1.09 (1.03-1.15)     |                         |
| <i>Gender and age</i>                                |                  | <0.001                  |                      | <0.001                  |
| 18-29                                                | 1.11 (0.86-1.43) |                         | 1.24 (0.92-1.67)     |                         |
| 30-39                                                | 1.35 (1.14-1.59) |                         | 1.39 (1.14-1.69)     |                         |
| 40-49                                                | 1.28 (1.14-1.45) |                         | 1.39 (1.21-1.60)     |                         |
| 50-59                                                | 1.05 (0.96-1.16) |                         | 1.13 (1.01-1.27)     |                         |
| 60-69                                                | 0.92 (0.84-1.01) |                         | 1.00 (0.90-1.10)     |                         |
| 70-79                                                | 0.74 (0.65-0.85) |                         | 0.81 (0.70-0.93)     |                         |
| <i>Gender and race/ethnicity</i>                     |                  | 0.03                    |                      | 0.01                    |
| White                                                | 0.93 (0.87-1.00) |                         | 0.98 (0.90-1.07)     |                         |
| Black                                                | 1.08 (1.00-1.16) |                         | 1.17 (1.08-1.27)     |                         |
| Hispanic                                             | 1.19 (0.87-1.63) |                         | 1.43 (0.99-2.06)     |                         |
| Other                                                | 1.08 (0.81-1.44) |                         | 1.13 (0.81-1.57)     |                         |
| <i>Gender and BMI</i>                                |                  | <0.001                  |                      | .02                     |
| Underweight                                          | 1.48 (1.02-2.15) |                         | 1.37 (0.89-2.11)     |                         |
| Normal                                               | 1.43 (1.29-1.59) |                         | 1.30 (1.15-1.46)     |                         |
| Overweight                                           | 0.98 (0.90-1.08) |                         | 1.05 (0.95-1.17)     |                         |
| Obese class I                                        | 1.00 (0.90-1.10) |                         | 1.05 (0.93-1.17)     |                         |
| Obese class II                                       | 0.85 (0.74-0.97) |                         | 0.99 (0.85-1.17)     |                         |
| Obese class III                                      | 0.79 (0.67-0.94) |                         | 0.97 (0.80-1.16)     |                         |
| <i>Gender and attributed cause of kidney failure</i> |                  | 0.01                    |                      | 0.38                    |
| Diabetes                                             | 0.92 (0.85-0.99) |                         | 1.07 (0.99-1.16)     |                         |
| Hypertension                                         | 1.02 (0.93-1.12) |                         | 1.14 (1.03-1.26)     |                         |
| Glomerulonephritis                                   | 0.92 (0.79-1.06) |                         | 0.97 (0.81-1.15)     |                         |
| Other                                                | 1.18 (1.04-1.35) |                         | 1.13 (0.96-1.34)     |                         |

\* Model adjusted for age, race, attributed cause of kidney failure, BMI, comorbidities, insurance, patient informed of transplant options, and neighborhood-level factor. 5.2% missing data.

Abbreviations: BMI = body mass index; CI = confidence interval; ESKD = end-stage kidney disease; KRT = kidney replacement therapy; OR = odds ratio

**Supplementary Table 5** Crude and adjusted Hazards Ratios for the association between preemptive referral and placement on the deceased donor waitlist (A) or receipt of a living donor transplant (B), overall and by gender, among all patients initiating KRT between 2015 and 2019 with follow-up through 2020 in the Southeast US, *accounting for competing risk of death and deceased donor transplant*<sup>1</sup>

|                                        | <b>Crude HR 95%CI)</b>                                                                                                      | <b>Adjusted HR (95%CI)*</b> |
|----------------------------------------|-----------------------------------------------------------------------------------------------------------------------------|-----------------------------|
| <b>A. Waitlisting</b>                  | HR examining association between preemptive referral and waitlisting (ref=not preemptively referred)                        |                             |
| Total population                       | 8.77 (8.41-9.14)                                                                                                            | 5.28 (5.02-5.55)            |
| Women                                  | 10.17 (9.51-10.89)                                                                                                          | 5.77 (5.34-6.23)            |
| Men                                    | 7.92 (7.49-8.37)                                                                                                            | 4.97 (4.66-5.30)            |
| <b>B. Living donor transplantation</b> | HR examining association between preemptive referral and receipt of living donor transplant (ref=not preemptively referred) |                             |
| Total population                       | 15.87 (14.02-17.98)                                                                                                         | 4.38 (3.71-5.17)            |
| Women                                  | 19.90 (15.90-24.90)                                                                                                         | 4.80 (3.66-6.29)            |
| Men                                    | 14.14 (12.15-16.46)                                                                                                         | 4.19 (3.45-5.09)            |

<sup>1</sup>Deceased donor transplant was treated as a competing risk for living donor transplant only; \* Model adjusted for age, race, attributed cause of kidney failure, BMI, comorbidities, insurance, patient informed of transplant options, and neighborhood-level factor. 5.2% missing data.

Abbreviations: CI = confidence interval; ESKD = end-stage kidney disease; HR = hazard ratio; KRT = kidney replacement therapy

**Supplementary Table 6** Crude and adjusted Hazards Ratios for the association between preemptive referral and placement on the deceased donor waitlist (A) or receipt of a living donor transplant (B), overall and by sex/gender, among patients referred for kidney transplantation (n=24,114) between 2015 and 2019 with follow-up through 2020 in the Southeast US.

|                                        | <b>Crude HR 95%CI)</b>                                                                                                          | <b>Fully adjusted HR (95% CI)*</b> |
|----------------------------------------|---------------------------------------------------------------------------------------------------------------------------------|------------------------------------|
| <b>A. Waitlisting</b>                  | HR examining association between preemptive referral and waitlisting (ref=referred after dialysis start)                        |                                    |
| Total population                       | 4.19 (4.01-4.40)                                                                                                                | 3.07 (2.92-3.22)                   |
| Women                                  | 4.50 (4.19-4.82)                                                                                                                | 3.15 (2.92-3.40)                   |
| Men                                    | 4.01 (3.79-4.25)                                                                                                                | 3.01 (2.83-3.21)                   |
| <b>B. Living donor transplantation</b> | HR examining association between preemptive referral and receipt of living donor transplant (ref=referred after dialysis start) |                                    |
| Total population                       | 8.20 (7.17-9.38)                                                                                                                | 2.87 (2.45-3.37)                   |
| Women                                  | 9.39 (7.41-11.90)                                                                                                               | 2.97 (2.26-3.91)                   |
| Men                                    | 7.78 (6.61-9.16)                                                                                                                | 2.83 (2.34-3.42)                   |

\*Model adjusted for age, race, attributed cause of kidney failure, BMI, comorbidities, insurance, patient informed of transplant options, and neighborhood-level factor. 5.2% missing data.

Abbreviations: BMI = body mass index; CI = confidence interval; HR = hazard ratio
